# Supplementary material
Source: publisher figshare collection journal article supplement (https://gsapubs.figshare.com/ndownloader/files/22741934)
Supplement: Supplementary file 1 [file 22741934]

TABLE 1.--LIST OF WELLS IDENTIFIED BY NUMBERS IN FIGURES 3 AND 4

1. Texaco No. 1 Sheely  
sec. 28, T 19 N, R 12 E, Oktibbeha County, Mississippi
2. McAlester No. A-1 Sudduth  
sec. 6, T 19 N, R 15 E, Oktibbeha County, Mississippi
3. composite of Atlantic No. 1 Dunning  
sec. 12, T 19 N, R 16 E, Clay County, Mississippi; and  
Shell No. 1 Chism  
sec. 24, T 19 N, R 16 E, Lowndes County, Mississippi
4. composite of Pruet and Hughes and Amerada Hess No. 1 Livingston  
sec. 11, T 17 S, R 18 W, Lowndes County, Mississippi; and  
Pruet and Baria Mason No. 1 Gilmer  
sec. 14, T 17 S, R 18 W, Lowndes County, Mississippi
5. Hughes and Hughes and Warrior No. 1 Bardon  
sec. 14, T 16 S, R 16 W, Lamar County, Alabama
6. Terra No. 1 Glasgow  
sec. 19, T 15 S, R 14 W, Lamar County, Alabama
7. Warrior No. 20-1 Breitling  
sec. 20, T 14 S, R 12 W, Fayette County, Alabama
8. Champlin No. 1 Galloway  
sec. 12, T 13 S, R 10 W, Walker County, Alabama
9. Energy No. 17-12 Deason  
sec. 17, T 12 S, R 8 W, Winston County, Alabama
10. Kelton No. 1 Grant  
sec. 32, T 11 S, R 7 W, Winston County, Alabama
11. Texas Eastern No. 1 Horton

sec. 19, T 10 S, R 4 W, Cullman County, Alabama

12. Terra No. 1 Durrett

sec. 36, T 20 S, R 7 W, Tuscaloosa County, Alabama

13. waste disposal well, Reichhold Chemicals

sec. 3, T 21 S, R 9 W, Tuscaloosa County, Alabama

14. Terra No. 1 Friedman

sec. 36, T 19 S, R 10 W, Tuscaloosa County, Alabama

15. American Quasar and Conwood No. 1 Wright

sec. 18, T 19 S, R 10 W, Tuscaloosa County, Alabama

16. Carless No. 1 Patterson

sec. 20, T 18 S, R 11 W, Tuscaloosa County, Alabama

17. Hunt No. 1 Brown Foundation

sec. 1, T 18 S, R 13 W, Pickens County, Alabama

18. Pruet No. 1 Williamson

sec. 18, T 17 S, R 14 W, Lamar County, Alabama

19. Dalton-Buie No. 1 Rye

sec. 15, T 15 S, R 17 W, Monroe County, Mississippi

20. Burns No. 6-1 Hilliard

sec. 6, T 14 S, R 18 W, Monroe County, Mississippi

21. Magnolia No. 1 Pierce

sec. 22, T 13 S, R 7 E, Monroe County, Mississippi
